# Supplementary material for: Orexin neuropeptides modulate the hippocampal-dependent memory through basolateral amygdala interconnections
Source: PubMed Central journal article supplement — Cereb Circ Cogn Behav. 2021 Dec 31;3:100035. doi: 10.1016/j.cccb.2021.100035 (PMC9616276; doi:10.1016/j.cccb.2021.100035), 2021-12-31
Supplement: mmc1.pdf [file mmc1.pdf]

# EDITING CERTIFICATE

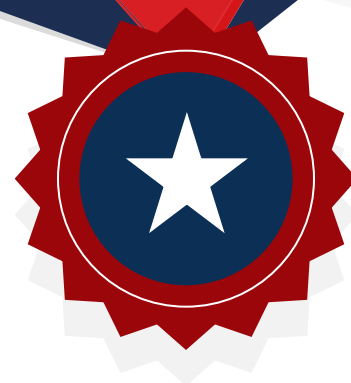

This document certifies that the manuscript listed below was edited for proper English language, grammar, punctuation, spelling, and overall style by one or more of the highly qualified native English speaking editors at Custom Language Service Provider.

Neither the research content nor the authors' intentions were altered in any way during the editing process. Documents receiving this certification should be English-ready for publication; however, the author has the ability to accept or reject our suggestions and changes.

**Manuscript title:**

Orexin neuropeptides modulate the hippocampal-dependent memory through basolateral amygdala interconnections.

**Author(s):**

Mahdi Abounoori, Mohammad Moein Maddah, Motahareh Rouhi Ardeshiri.

NOVEMBER 01, 2021

DATE ISSUED

REF35319

CERTIFICATION KEY

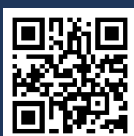

CUSTOMLSP.CA  
INFO@CUSTOMLSP.CA

This certificate can be verified at: <https://www.customlsp.ca/verify/ref35319>
